# Supplementary material for: The Use of Added Salt and Sugar in the Diet of Polish and Austrian Toddlers. Associated Factors and Dietary Patterns, Feeding and Maternal Practices
Source: PubMed Central journal article supplement (PMC7400520; doi:10.3390/ijerph17145025), 2020-07-13
Supplement: ijerph-17-05025-s001.pdf [file ijerph-17-05025-s001.pdf]

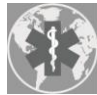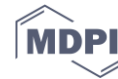

1 Article

2 **The Use of Added Salt and Sugar in the Diet of Polish and Austrian Toddlers.**  
3 **Associated Factors and Dietary Patterns, Feeding and Maternal Practices**

4 Daria Masztalerz-Kozubek <sup>1</sup>, Monika A. Zielinska <sup>1</sup>, Petra Rust <sup>2</sup>, Dorota Majchrzak <sup>2</sup> and Jadwiga Hamulka <sup>1,\*</sup>

5

6

**Table S1.** Univariate regression analysis models of factors influencing the use of added salt, sugar, and salt and sugar in Polish toddlers (*n* = 4110).

| Variable                                         | 12 - 24 months<br>( <i>n</i> = 2680) |                       |                       | 25 - 36 months<br>( <i>n</i> = 1430) |                      |                      |
|--------------------------------------------------|--------------------------------------|-----------------------|-----------------------|--------------------------------------|----------------------|----------------------|
|                                                  | AS<br>OR (95% CI)                    | ASu<br>OR (95% CI)    | AS&Su<br>OR (95% CI)  | AS<br>OR (95% CI)                    | ASu<br>OR (95% CI)   | AS&Su<br>OR (95% CI) |
| <b>Toddler age:</b>                              | 1.18 (1.16 – 1.21)***                | 1.14 (1.11 – 1.16)*** | 1.16 (1.14 – 1.19)*** | 1.02 (0.99 – 1.06)                   | 1.02 (0.99 – 1.05)   | 1.01 (0.98 – 1.04)   |
| <b>Maternal age:</b>                             |                                      |                       |                       |                                      |                      |                      |
| < 25 years                                       | 0.88 (0.62 – 1.24)                   | 1.27 (0.89 – 1.81)    | 1.13 (0.77 – 1.65)    | 1.54 (0.76 – 3.14)                   | 2.38 (1.22 – 4.63)** | 2.28 (1.24 – 4.22)** |
| 25–29 years                                      | 0.93 (0.79 – 1.10)                   | 1.03 (0.87 – 1.23)    | 1.04 (0.86 – 1.26)    | 1.38 (1.03 – 1.85)*                  | 1.45 (1.12 – 1.89)** | 1.46 (1.13 – 1.88)** |
| 30–34 years                                      | 1                                    | 1                     | 1                     | 1                                    | 1                    | 1                    |
| 35–39 years                                      | 1.06 (0.83 – 1.35)                   | 0.81 (0.62 – 1.06)    | 0.85 (0.64 – 1.13)    | 1.29 (0.92 – 1.82)                   | 0.95 (0.71 – 1.28)   | 1.10 (0.82 – 1.47)   |
| ≥ 40 years                                       | 0.73 (0.37 – 1.43)                   | 0.24 (0.08 – 0.69)**  | 0.35 (0.12 – 1.00)*   | 1.45 (0.58 – 3.62)                   | 0.67 (0.31 – 1.42)   | 0.83 (0.39 – 1.78)   |
| <b>Maternal education:</b>                       |                                      |                       |                       |                                      |                      |                      |
| Primary and vocational                           | 2.41 (1.06 – 5.46)*                  | 1.81 (0.87 – 3.77)    | 2.67 (1.28 – 5.56)**  | 3.28 (0.41 – 25.98)                  | 1.65 (0.43 – 6.42)   | 2.33 (0.60 – 9.06)   |
| High school                                      | 1.16 (0.91 – 1.46)                   | 1.19 (0.94 – 1.52)    | 1.30 (1.01 – 1.68)*   | 1.69 (1.10 – 2.59)*                  | 1.13 (0.80 – 1.58)   | 1.26 (0.90 – 1.75)   |
| University                                       | 1                                    | 1                     | 1                     | 1                                    | 1                    | 1                    |
| <b>Parity:</b>                                   |                                      |                       |                       |                                      |                      |                      |
| Primiparias                                      | 1                                    | 1                     | 1                     | 1                                    | 1                    | 1                    |
| Multiparias                                      | 1.81 (1.52 – 2.16)***                | 1.34 (1.13 – 1.60)*** | 1.54 (1.28 – 1.85)*** | 1.41 (1.11 – 1.80)**                 | 1.30 (1.05 – 1.61)** | 1.36 (1.10 – 1.68)** |
| <b>Living area:</b>                              |                                      |                       |                       |                                      |                      |                      |
| Rural                                            | 1.14 (0.93 – 1.39)                   | 1.22 (0.99 – 1.49)    | 1.23 (0.99 – 1.53)    | 1.20 (0.86 – 1.66)                   | 1.34 (1.01 – 1.79)*  | 1.34 (1.02 – 1.77)*  |
| Urban                                            | 1                                    | 1                     | 1                     | 1                                    | 1                    | 1                    |
| <b>Macroeconomic region (GDP EU-28 average):</b> |                                      |                       |                       |                                      |                      |                      |
| 47–50%                                           | 1.12 (0.87 – 1.45)                   | 0.95 (0.72 – 1.24)    | 0.93 (0.70 – 1.24)    | 1.00 (0.66 – 1.51)                   | 1.18 (0.82 – 1.70)   | 1.11 (0.77 – 1.59)   |
| 51–100%                                          | 0.98 (0.81 – 1.18)                   | 1.03 (0.85 – 1.25)    | 0.94 (0.77 – 1.16)    | 0.98 (0.73 – 1.30)                   | 1.14 (0.89 – 1.47)   | 1.13 (0.88 – 1.45)   |
| 101–110%                                         | 1                                    | 1                     | 1                     | 1                                    | 1                    | 1                    |
| <b>Average monthly income per capita (PLN):</b>  |                                      |                       |                       |                                      |                      |                      |

SOCIODEMOGRAPHIC FACTORS

|                         |                                      |                       |                       |                       |                      |                      |                      |
|-------------------------|--------------------------------------|-----------------------|-----------------------|-----------------------|----------------------|----------------------|----------------------|
|                         | <500                                 | 1.68 (0.85 – 3.33)    | 1.09 (0.54 – 2.22)    | 1.86 (0.91 – 3.83)    | 2.51 (0.71 – 8.85)   | 2.27 (0.80 – 6.40)   | 2.56 (0.96 – 6.82)   |
|                         | 500–1000                             | 1.37 (1.02 – 1.85)*   | 1.41 (1.03 – 1.92)*   | 1.75 (1.25 – 2.47)*** | 1.31 (0.83 – 2.07)   | 1.05 (0.70 – 1.58)   | 1.12 (0.75 – 1.67)   |
|                         | 1001–2000                            | 1.17 (0.90 – 1.51)    | 1.17 (0.88 – 1.54)    | 1.33 (0.98 – 1.82)    | 1.13 (0.77 – 1.65)   | 0.93 (0.66 – 1.31)   | 1.00 (0.72 – 1.41)   |
|                         | 2001–2500                            | 1.43 (1.07 – 1.91)**  | 1.34 (0.99 – 1.81)    | 1.68 (1.20 – 2.34)**  | 1.23 (0.80 – 1.89)   | 1.03 (0.70 – 1.52)   | 1.02 (0.69 – 1.49)   |
|                         | 2501–3000                            | 1                     | 1                     | 1                     | 1                    | 1                    | 1                    |
|                         | ≥3001                                | 0.98 (0.74 – 1.28)    | 0.95 (0.71 – 1.28)    | 1.11 (0.79 – 1.55)    | 1.11 (0.74 – 1.66)   | 0.83 (0.58 – 1.20)   | 0.82 (0.57 – 1.17)   |
| FEEDING-RELATED FACTORS | <b>Timing of CFI:</b>                |                       |                       |                       |                      |                      |                      |
|                         | <4 months                            | 1.53 (0.87 – 2.67)    | 1.30 (0.74 – 2.29)    | 1.24 (0.67 – 2.29)    | 1.98 (0.94 – 4.19)   | 0.83 (0.46 – 1.50)   | 1.06 (0.59 – 1.91)   |
|                         | 4–6 months                           | 1.36 (1.16 – 1.59)*** | 1.08 (0.91 – 1.27)    | 1.25 (1.04 – 1.49)*   | 1.48 (1.16 – 1.90)** | 1.26 (1.01 – 1.58)*  | 1.40 (1.12 – 1.75)** |
|                         | ≥7 months                            | 1                     | 1                     | 1                     | 1                    | 1                    | 1                    |
|                         | <b>Complementary feeding method:</b> |                       |                       |                       |                      |                      |                      |
|                         | Spoon feeding                        | 1.45 (1.21 – 1.74)*** | 0.99 (0.82 – 1.19)    | 1.14 (0.93 – 1.38)    | 1.15 (0.87 – 1.53)   | 1.09 (0.85 – 1.39)   | 1.12 (0.88 – 1.42)   |
|                         | Mixed                                | 1                     | 1                     | 1                     | 1                    | 1                    | 1                    |
|                         | BLW                                  | 0.70 (0.57 – 0.87)*** | 1.00 (0.80 – 1.24)    | 0.82 (0.64 – 1.05)    | 0.70 (0.52 – 0.95)*  | 0.67 (0.50 – 0.88)** | 0.66 (0.50 – 0.88)** |
|                         | <b>Types of CF:</b>                  |                       |                       |                       |                      |                      |                      |
|                         | Commercial                           | 1.59 (1.28 – 1.97)*** | 0.87 (0.70 – 1.09)    | 1.09 (0.85 – 1.39)    | 0.96 (0.69 – 1.34)   | 0.97 (0.73 – 1.30)   | 1.02 (0.77 – 1.36)   |
|                         | Homemade                             | 1.22 (1.02 – 1.45)*   | 0.96 (0.80 – 1.16)    | 1.14 (0.94 – 1.40)    | 0.99 (0.75 – 1.30)   | 0.99 (0.78 – 1.27)   | 0.98 (0.77 – 1.24)   |
|                         | Family                               | 1                     | 1                     | 1                     | 1                    | 1                    | 1                    |
|                         | <b>Currently BF:</b>                 |                       |                       |                       |                      |                      |                      |
|                         | No                                   | 1.77 (1.51 – 2.07)*** | 1.30 (1.11 – 1.53)**  | 1.48 (1.25 – 1.77)*** | 1.51 (1.17 – 1.95)** | 1.07 (0.85 – 1.35)   | 1.20 (0.95 – 1.51)   |
|                         | Yes                                  | 1                     | 1                     | 1                     | 1                    | 1                    | 1                    |
|                         | <b>EBF duration:</b>                 |                       |                       |                       |                      |                      |                      |
|                         | Never BF                             | 1.35 (0.94 – 1.93)    | 1.61 (1.13 – 2.31)**  | 1.60 (1.09 – 2.33)*   | 2.51 (1.31 – 4.81)** | 1.34 (0.82 – 2.21)   | 1.51 (0.93 – 2.46)   |
|                         | Never EBF                            | 1.06 (0.89 – 1.25)    | 1.03 (0.86 – 1.23)    | 1.07 (0.88 – 1.30)    | 1.34 (1.02 – 1.75)*  | 1.15 (0.90 – 1.47)   | 1.21 (0.95 – 1.54)   |
| 1–3 months              | 2.00 (1.10 – 3.62)*                  | 0.94 (0.51 – 1.72)    | 1.41 (0.77 – 2.60)    | 1.52 (0.67 – 3.44)    | 1.04 (0.52 – 2.08)   | 1.36 (0.68 – 2.71)   |                      |
| 4–5 months              | 2.08 (1.52 – 2.86)***                | 1.80 (1.33 – 2.44)*** | 1.98 (1.45 – 2.71)*** | 1.97 (1.26 – 3.08)**  | 1.21 (0.83 – 1.76)   | 1.38 (0.95 – 1.98)   |                      |
| 6–7 months              | 1                                    | 1                     | 1                     | 1                     | 1                    | 1                    |                      |
| >7 months               | 0.80 (0.21 – 2.99)                   | 0.26 (0.03 – 2.06)    | 0.39 (0.05 – 3.11)    | 0.79 (0.23 – 2.74)    | 0.93 (0.28 – 3.11)   | 0.95 (0.29 – 3.17)   |                      |

AS – added salt; ASu – added sugar; AS&Su – added salt and sugar; BF – breastfeeding; BLW – Baby-Led Weaning; CF – complementary foods; CFI – complementary feeding introduction;

CI – confidence interval; CF – complementary foods; EBF – exclusive breastfeeding; GDP – Gross Domestic Product; OR – odds ratio; TSF – traditional spoonfeeding;

\*  $p \leq 0.05$ ; \*\*  $p \leq 0.01$ ; \*\*\*  $p \leq 0.001$ .

7  
8  
9  
10  
11  
12

13

14

**Table S2.** Univariate regression analysis models of factors influencing the use of added salt, sugar, and salt and sugar in Austrian toddlers ( $n = 1783$ ).

| Variable                                         | 12 - 24 months<br>( $n = 941$ ) |                       |                       | 25 - 36 months<br>( $n = 842$ ) |                      |                      |
|--------------------------------------------------|---------------------------------|-----------------------|-----------------------|---------------------------------|----------------------|----------------------|
|                                                  | AS<br>OR (95% CI)               | ASu<br>OR (95% CI)    | AS&Su<br>OR (95% CI)  | AS<br>OR (95% CI)               | ASu<br>OR (95% CI)   | AS&Su<br>OR (95% CI) |
| <b>Toddler age:</b>                              | 1.16 (1.11 – 1.21)***           | 1.13 (1.09 – 1.18)*** | 1.14 (1.09 – 1.18)*** | 1.02 (0.97 – 1.08)              | 1.04 (1.00 – 1.08)*  | 1.05 (1.01 – 1.09)*  |
| <b>Maternal age:</b>                             |                                 |                       |                       |                                 |                      |                      |
| < 25 years                                       | 1.56 (0.78 – 3.11)              | 1.17 (0.65 – 2.12)    | 1.24 (0.69 – 2.23)    | 0.58 (0.19 – 1.81)              | 0.72 (0.30 – 1.70)   | 0.61 (0.25 – 1.49)   |
| 25–29 years                                      | 1.08 (0.75 – 1.56)              | 0.99 (0.70 – 1.40)    | 0.97 (0.68 – 1.38)    | 0.77 (0.45 – 1.31)              | 0.87 (0.61 – 1.24)   | 0.88 (0.62 – 1.26)   |
| 30–34 years                                      | 1                               | 1                     | 1                     | 1                               | 1                    | 1                    |
| 35–39 years                                      | 0.97 (0.66 – 1.42)              | 0.85 (0.58 – 1.25)    | 0.85 (0.58 – 1.26)    | 0.85 (0.51 – 1.42)              | 0.91 (0.65 – 1.27)   | 0.88 (0.63 – 1.23)   |
| ≥ 40 years                                       | 0.89 (0.40 – 2.00)              | 0.99 (0.44 – 2.21)    | 1.05 (0.47 – 2.34)    | 0.64 (0.29 – 1.42)              | 1.11 (0.63 – 1.96)   | 1.07 (0.61 – 1.89)   |
| <b>Maternal education:</b>                       |                                 |                       |                       |                                 |                      |                      |
| Primary and vocational                           | 1.28 (0.90 – 1.80)              | 1.32 (0.96 – 1.81)    | 1.34 (0.98 – 1.85)    | 1.01 (0.63 – 1.61)              | 1.06 (0.77 – 1.45)   | 1.01 (0.74 – 1.39)   |
| High school                                      | 0.51 (0.25 – 1.06)              | 0.78 (0.33 – 1.84)    | 0.68 (0.28 – 1.69)    | 2.21 (0.52 – 9.44)              | 1.57 (0.77 – 3.21)   | 1.43 (0.70 – 2.91)   |
| University                                       | 1                               | 1                     | 1                     | 1                               | 1                    | 1                    |
| <b>Parity:</b>                                   |                                 |                       |                       |                                 |                      |                      |
| Primiparias                                      | 1                               | 1                     | 1                     | 1                               | 1                    | 1                    |
| Multiparias                                      | 1.48 (1.09 – 2.01)**            | 1.82 (1.37 – 2.43)*** | 1.82 (1.36 – 2.44)*** | 0.85 (0.55 – 1.30)              | 1.10 (0.83 – 1.45)   | 1.13 (0.85 – 1.49)   |
| <b>Living area:</b>                              |                                 |                       |                       |                                 |                      |                      |
| Rural                                            | 1.47 (1.10 – 1.98)**            | 1.72 (1.28 – 2.31)*** | 1.73 (1.28 – 2.34)*** | 1.16 (0.77 – 1.75)              | 1.23 (0.94 – 1.62)   | 1.20 (0.91 – 1.58)   |
| Urban                                            | 1                               | 1                     | 1                     | 1                               | 1                    | 1                    |
| <b>Macroeconomic region (GDP EU-28 average):</b> |                                 |                       |                       |                                 |                      |                      |
| 47–50%                                           | -                               | -                     | -                     | -                               | -                    | -                    |
| 51–100%                                          | 1.18 (0.58 – 2.38)              | 1.43 (0.78 – 2.60)    | 1.48 (0.81 – 2.70)    | 3.55 (0.83 – 15.12)             | 0.38 (0.19 – 0.74)** | 0.39 (0.20 – 0.76)** |
| 101–110%                                         | 1                               | 1                     | 1                     | 1                               | 1                    | 1                    |
| 111–130%                                         | 0.83 (0.57 – 1.19)              | 1.20 (0.85 – 1.69)    | 1.15 (0.81 – 1.63)    | 1.11 (0.68 – 1.83)              | 0.81 (0.58 – 1.14)   | 0.76 (0.54 – 1.06)   |
| 131–150%                                         | 1.01 (0.58 – 1.75)              | 0.64 (0.36 – 1.13)    | 0.61 (0.34 – 1.10)    | 2.07 (0.91 – 4.75)              | 0.64 (0.41 – 1.02)   | 0.63 (0.40 – 1.00)   |
| >150%                                            | 0.66 (0.44 – 1.01)              | 0.85 (0.55 – 1.32)    | 0.82 (0.53 – 1.28)    | 0.97 (0.55 – 1.71)              | 0.58 (0.39 – 0.86)** | 0.56 (0.37 – 0.83)*  |
| <b>Average monthly income per capita (EUR):</b>  |                                 |                       |                       |                                 |                      |                      |

SOCIODEMOGRAPHIC FACTORS

|  |                                      |                       |                       |                       |                     |                     |                     |
|--|--------------------------------------|-----------------------|-----------------------|-----------------------|---------------------|---------------------|---------------------|
|  | <1000                                | 0.91 (0.45 – 1.81)    | 0.97 (0.47 – 1.99)    | 1.19 (0.57 – 2.51)    | 1.42 (0.62 – 3.23)  | 0.97 (0.53 – 1.77)  | 0.90 (0.49 – 1.65)  |
|  | 1000-1500                            | 1.22 (0.68 – 2.21)    | 1.51 (0.84 – 2.72)    | 1.66 (0.90 – 3.07)    | 2.26 (1.12 – 4.58)* | 1.19 (0.74 – 1.93)  | 1.18 (0.73 – 1.91)  |
|  | 1501-2000                            | 1.24 (0.71 – 2.15)    | 1.00 (0.57 – 1.77)    | 1.24 (0.69 – 2.25)    | 1.51 (0.82 – 2.78)  | 1.15 (0.73 – 1.81)  | 1.15 (0.73 – 1.82)  |
|  | 2001-3000                            | 1.07 (0.61 – 1.87)    | 1.18 (0.66 – 2.09)    | 1.40 (0.77 – 2.55)    | 1.67 (0.88 – 3.17)  | 1.10 (0.69 – 1.75)  | 1.10 (0.69 – 1.76)  |
|  | 3001-5000                            | 1                     | 1                     | 1                     | 1                   | 1                   | 1                   |
|  | ≥5001                                | 1.04 (0.30 – 3.62)    | 1.50 (0.46 – 4.92)    | 1.85 (0.56 – 6.15)    | 1.65 (0.45 – 6.05)  | 1.43 (0.60 – 3.42)  | 1.26 (0.53 – 3.02)  |
|  | <b>Timing of CFI:</b>                |                       |                       |                       |                     |                     |                     |
|  | <4 months                            | 1.11 (0.51 – 2.43)    | 0.85 (0.39 – 1.87)    | 0.76 (0.34 – 1.71)    | 1.85 (0.61 – 5.60)  | 1.21 (0.60 – 2.45)  | 1.00 (0.49 – 2.04)  |
|  | 4-6 months                           | 1.13 (0.79 – 1.62)    | 0.99 (0.69 – 1.40)    | 0.96 (0.67 – 1.36)    | 1.70 (1.07 – 2.71)* | 1.02 (0.73 – 1.44)  | 1.00 (0.71 – 1.41)  |
|  | ≥7 months                            | 1                     | 1                     | 1                     | 1                   | 1                   | 1                   |
|  | <b>Complementary feeding method:</b> |                       |                       |                       |                     |                     |                     |
|  | Spoon feeding                        | 0.89 (0.64 – 1.22)    | 1.10 (0.81 – 1.49)    | 1.06 (0.78 – 1.45)    | 1.25 (0.78 – 2.02)  | 1.04 (0.77 – 1.40)  | 0.99 (0.73 – 1.33)  |
|  | Mixed                                | 1                     | 1                     | 1                     | 1                   | 1                   | 1                   |
|  | BLW                                  | 0.60 (0.39 – 0.92)*   | 0.71 (0.44 – 1.13)    | 0.66 (0.41 – 1.08)    | 0.63 (0.37 – 1.08)  | 0.83 (0.55 – 1.24)  | 0.77 (0.51 – 1.15)  |
|  | <b>Types of CF:</b>                  |                       |                       |                       |                     |                     |                     |
|  | Commercial                           | 1.33 (0.86 – 2.06)    | 1.08 (0.72 – 1.62)    | 1.17 (0.78 – 1.77)    | 2.05 (1.08 – 3.87)* | 0.99 (0.67 – 1.46)  | 1.03 (0.70 – 1.51)  |
|  | Homemade                             | 1.00 (0.70 – 1.41)    | 0.90 (0.64 – 1.28)    | 0.96 (0.68 – 1.36)    | 1.12 (0.70 – 1.79)  | 0.93 (0.67 – 1.30)  | 0.93 (0.67 – 1.30)  |
|  | Family                               | 1                     | 1                     | 1                     | 1                   | 1                   | 1                   |
|  | <b>Currently BF:</b>                 |                       |                       |                       |                     |                     |                     |
|  | No                                   | 1.88 (1.39 – 2.53)*** | 1.73 (1.27 – 2.35)*** | 1.72 (1.26 – 2.35)*** | 1.13 (0.69 – 1.88)  | 1.01 (0.72 – 1.43)  | 1.08 (0.76 – 1.53)  |
|  | Yes                                  | 1                     | 1                     | 1                     | 1                   | 1                   | 1                   |
|  | <b>EBF duration:</b>                 |                       |                       |                       |                     |                     |                     |
|  | Never BF                             | 0.89 (0.50 – 1.58)    | 1.20 (0.67 – 2.12)    | 1.20 (0.67 – 2.12)    | 1.92 (0.77 – 4.79)  | 1.89 (1.13 – 3.16)* | 1.71 (1.02 – 2.86)* |
|  | Never EBF                            | 1.41 (0.94 – 2.10)    | 1.29 (0.88 – 1.88)    | 1.19 (0.81 – 1.74)    | 1.08 (0.63 – 1.85)  | 1.52 (1.05 – 2.20)* | 1.42 (0.98 – 2.06)  |
|  | 1-3 months                           | 0.71 (0.39 – 1.31)    | 1.19 (0.63 – 2.24)    | 0.91 (0.47 – 1.78)    | 1.07 (0.46 – 2.46)  | 1.57 (0.90 – 2.76)  | 1.38 (0.79 – 2.43)  |
|  | 4-5 months                           | 1.00 (0.67 – 1.50)    | 1.00 (0.66 – 1.51)    | 0.96 (0.63 – 1.45)    | 1.14 (0.65 – 1.99)  | 1.45 (0.99 – 2.12)  | 1.40 (0.96 – 2.05)  |
|  | 6-7 months                           | 1                     | 1                     | 1                     | 1                   | 1                   | 1                   |
|  | >7 months                            | 1.38 (0.50 – 3.85)    | 1.47 (0.60 – 3.60)    | 1.47 (0.60 – 3.60)    | 0.41 (0.15 – 1.14)  | 1.35 (0.56 – 3.27)  | 1.35 (0.56 – 3.27)  |

AS – added salt; ASu – added sugar; AS&Su – added salt and sugar; BF – breastfeeding; BLW – Baby-Led Weaning; CF – complementary foods; CFI – complementary feeding introduction;

CI – confidence interval; CF – complementary foods; EBF – exclusive breastfeeding; GDP – Gross Domestic Product; OR – odds ratio; TSF – traditional spoonfeeding;

\*  $p \leq 0.05$ ; \*\*  $p \leq 0.01$ ; \*\*\*  $p \leq 0.001$ .

15  
16  
17  
18  
19  
20  
21  
22  
23

24

**Table S3.** Sources of knowledge about children nutrition according to the country, age group and use of added salt, sugar, and both salt and sugar.

| Variable | 12 - 24 months            |      |         |      |        |      | 25 - 36 months |      |         |      |        |      |         |
|----------|---------------------------|------|---------|------|--------|------|----------------|------|---------|------|--------|------|---------|
|          | AS                        |      | ASu     |      | AS&Su  |      | AS             |      | ASu     |      | AS&Su  |      |         |
|          | Yes                       | No   | Yes     | No   | Yes    | No   | Yes            | No   | Yes     | No   | Yes    | No   |         |
| Poland   | Internet                  | 93.1 | 94.3    | 93.9 | 93.6   | 93.5 | 93.8           | 90.9 | 88.8    | 88.4 | 91.7*  | 92.1 | 88.5*   |
|          | Books                     | 62.2 | 68.5*** | 64.2 | 65.7   | 62.0 | 66.3*          | 62.6 | 72.4*** | 69.2 | 62.3** | 61.2 | 69.2**  |
|          | Magazines                 | 14.3 | 11.4*   | 13.0 | 12.8   | 13.9 | 12.5           | 15.8 | 16.7    | 14.3 | 17.2   | 17.8 | 14.2    |
|          | TV                        | 4.7  | 2.0***  | 4.5  | 2.8*   | 5.2  | 2.8**          | 3.6  | 3.6     | 3.9  | 3.3    | 3.4  | 3.7     |
|          | Family or friends         | 49.9 | 40.6*** | 49.6 | 43.3** | 53.2 | 42.7***        | 47.1 | 39.9**  | 40.5 | 48.5** | 49.9 | 40.5*** |
|          | Doctor or midwife         | 32.0 | 27.7    | 31.6 | 29.1   | 32.5 | 29.1           | 34.7 | 32.5    | 33.4 | 34.6   | 35.0 | 33.2    |
|          | Nutritionist or dietitian | 11.4 | 15.8*** | 12.2 | 14.2   | 10.7 | 14.5**         | 8.2  | 11.5    | 10.4 | 8.1    | 7.9  | 10.2    |
| Austria  | Internet                  | 85.2 | 86.5    | 85.1 | 85.7   | 84.9 | 85.8           | 80.7 | 81.1    | 81.4 | 80.1   | 81.3 | 80.1    |
|          | Books                     | 80.7 | 79.7    | 76.6 | 81.9   | 76.5 | 81.9           | 80.7 | 83.0    | 82.0 | 79.8   | 81.8 | 80.1    |
|          | Magazines                 | 26.8 | 27.0    | 26.8 | 26.9   | 25.9 | 27.2           | 29.9 | 36.8    | 30.9 | 30.6   | 31.3 | 30.1    |
|          | TV                        | 8.1  | 7.6     | 8.4  | 7.8    | 8.0  | 8.0            | 7.5  | 11.3    | 7.0  | 9.1    | 7.5  | 8.5     |
|          | Family or friends         | 82.4 | 77.6    | 86.2 | 79.3*  | 87.3 | 79.0**         | 77.3 | 71.7    | 74.3 | 79.3   | 74.7 | 79.0    |
|          | Doctor or midwife         | 65.5 | 63.7    | 71.6 | 62.5** | 71.7 | 62.6**         | 67.1 | 59.4    | 63.2 | 69.7*  | 63.1 | 69.9*   |
|          | Nutritionist or dietitian | 36.8 | 50.2*** | 33.3 | 42.8** | 33.1 | 42.8**         | 35.6 | 48.1**  | 39.3 | 34.7   | 39.7 | 34.0    |

AS – added salt; ASu – added sugar; AS&Su – added salt and sugar; \*  $p \leq 0.05$ ; \*\*  $p \leq 0.01$ ; \*\*\*  $p \leq 0.001$ .

25
